# Supplementary material for: Comprehensive characterization of erythroid-specific enhancers in the genomic regions of human Krüppel-like factors
Source: PubMed Central journal article supplement (PMC3846580; doi:10.1186/1471-2164-14-587), 2013-08-28
Supplement: 1471-2164-14-587-S1.pdf [file 1471-2164-14-587-S1.pdf]

# Supplementary Figure S1

A

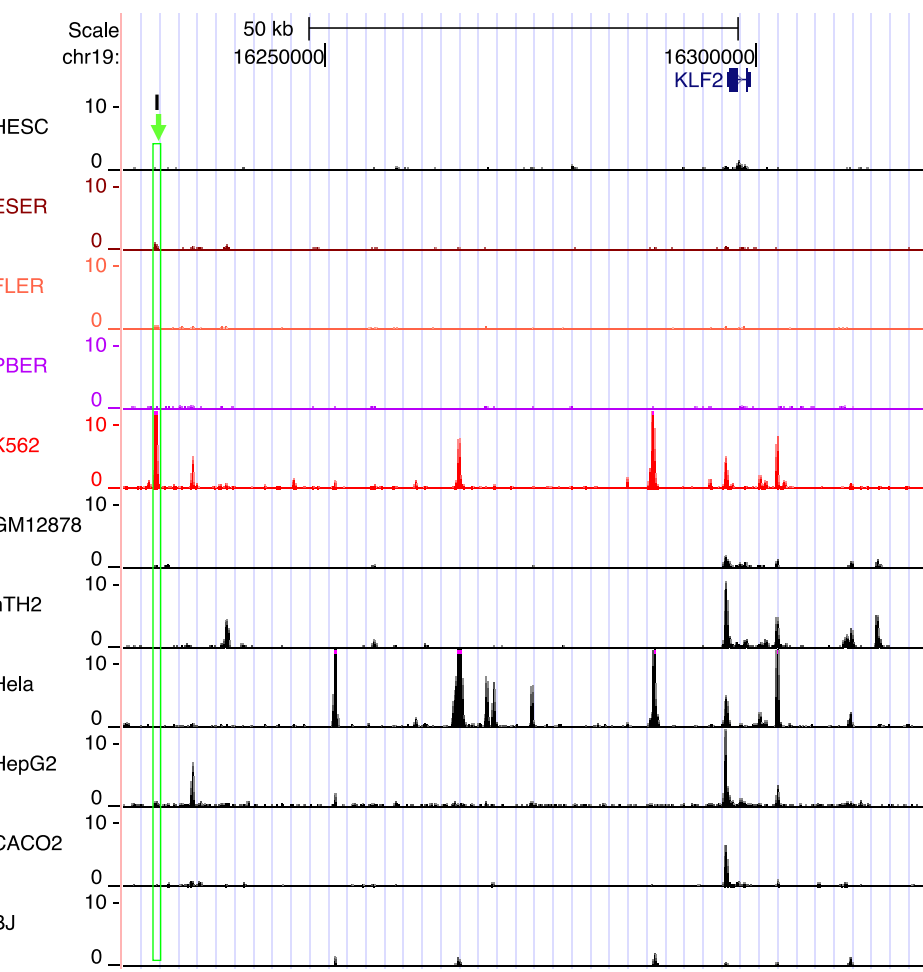

B

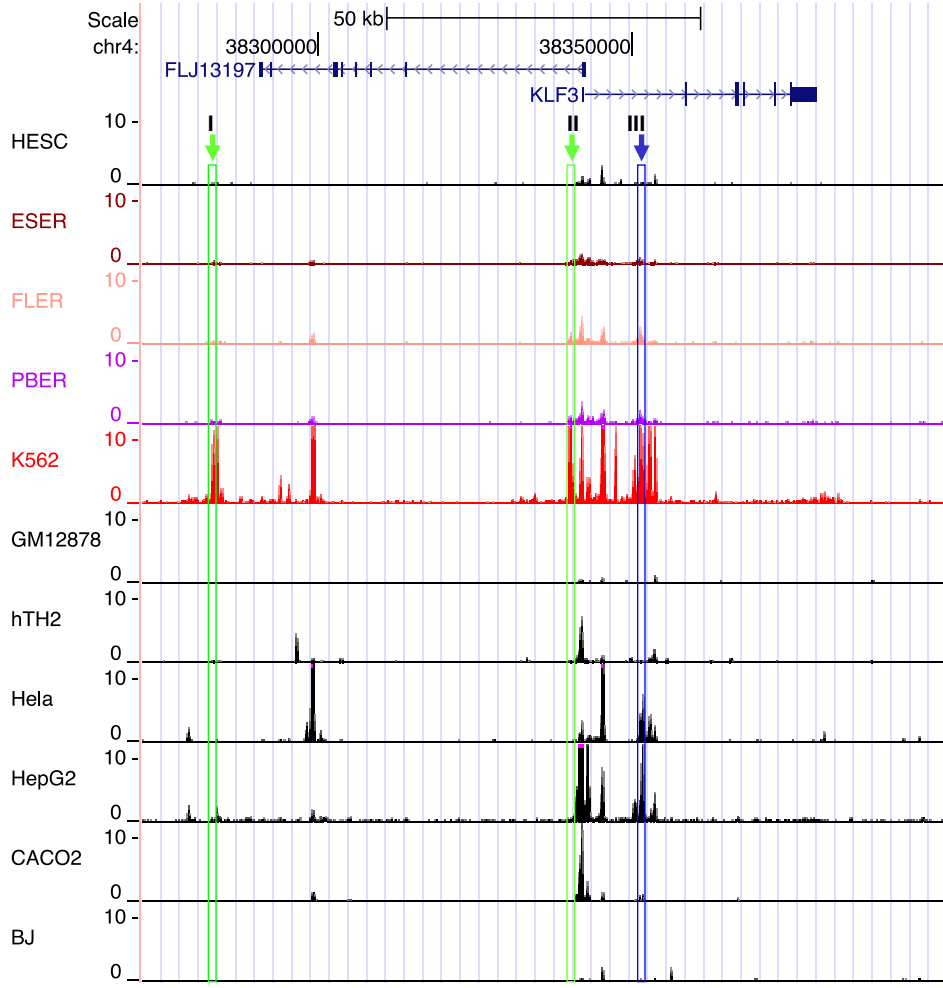

# Supplementary Figure S1

## C

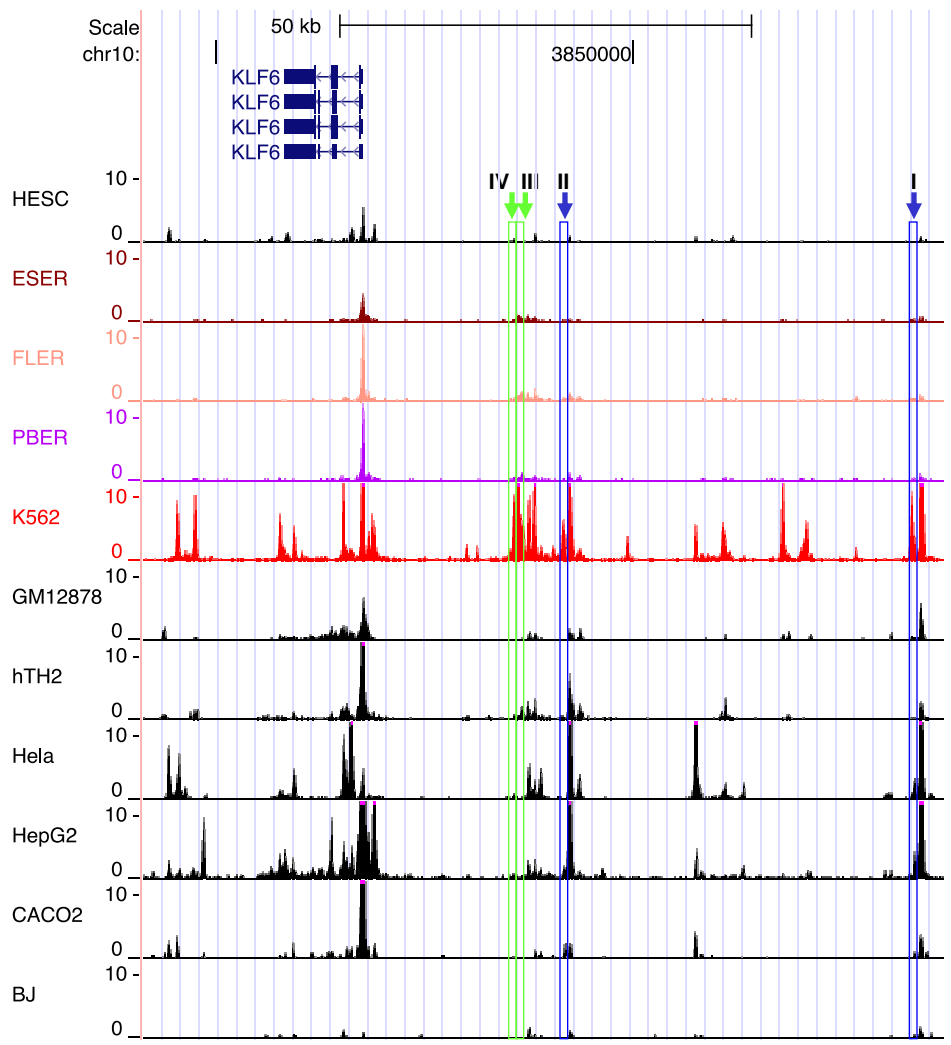

## D

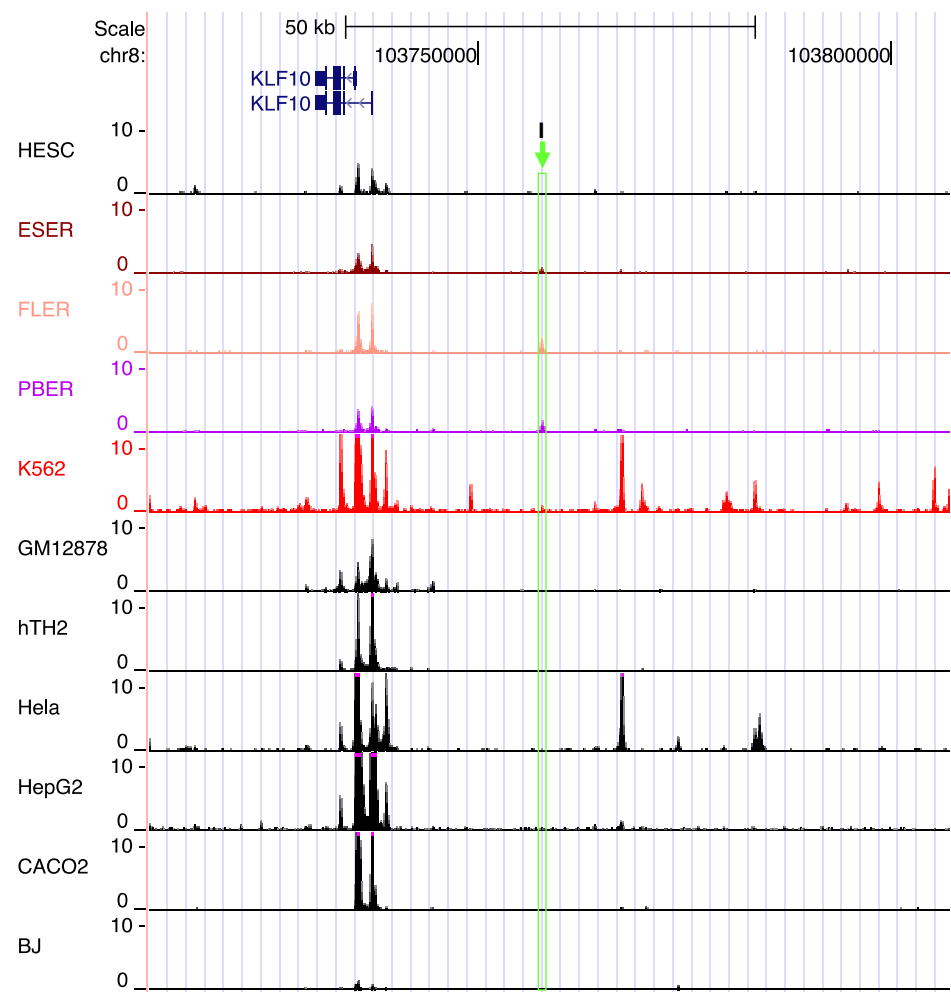

# Supplementary Figure S1

## E

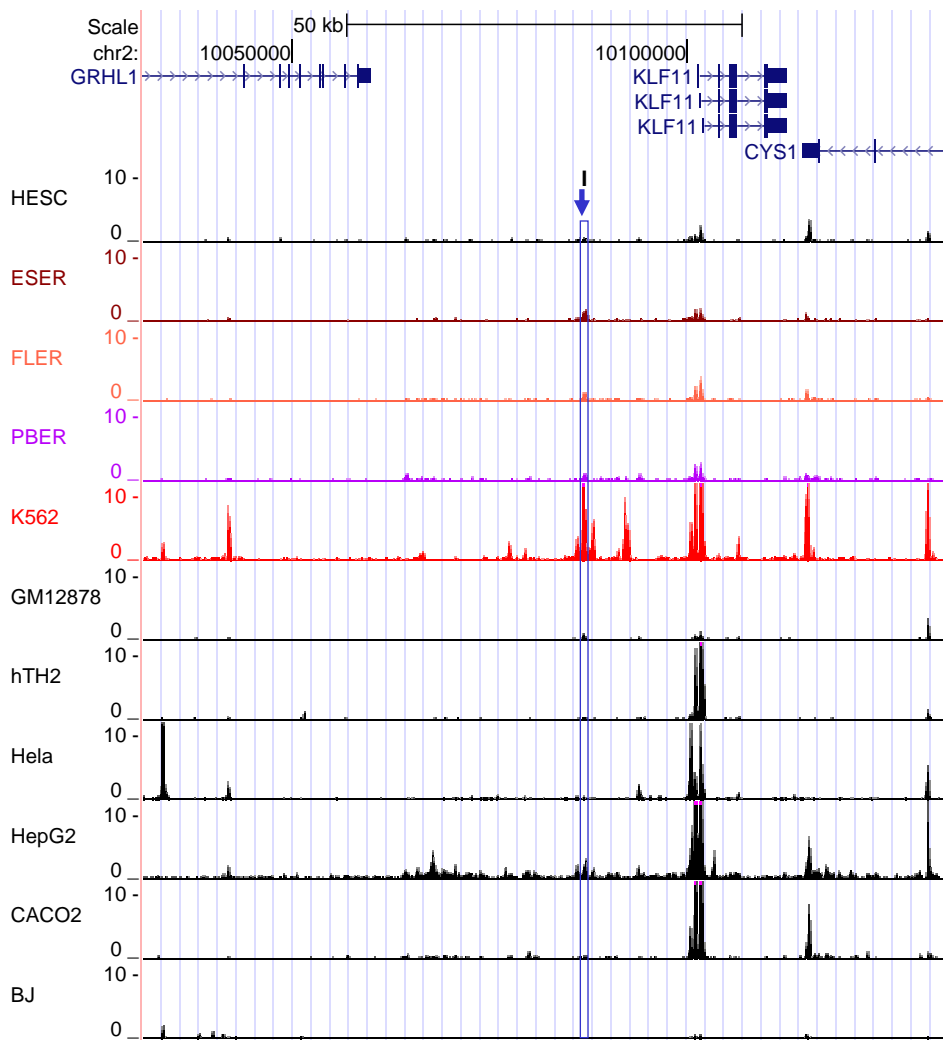

## F

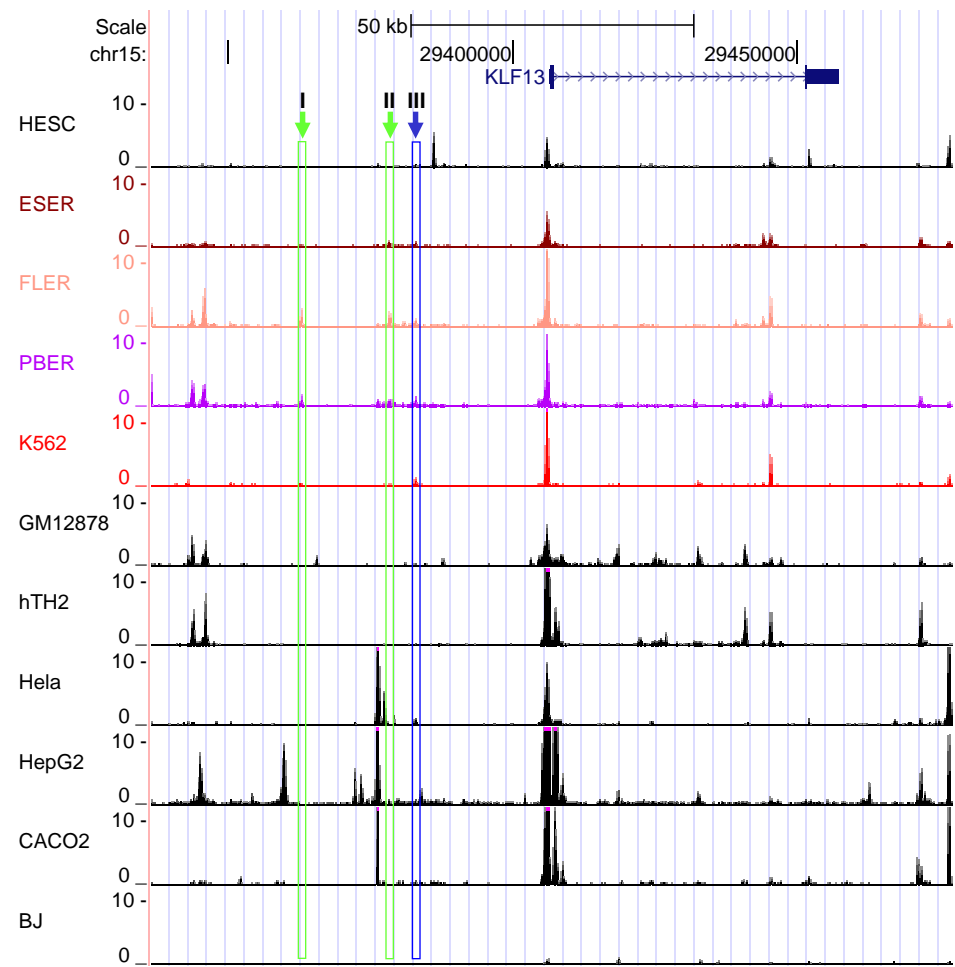

# Supplementary Figure S1

## G

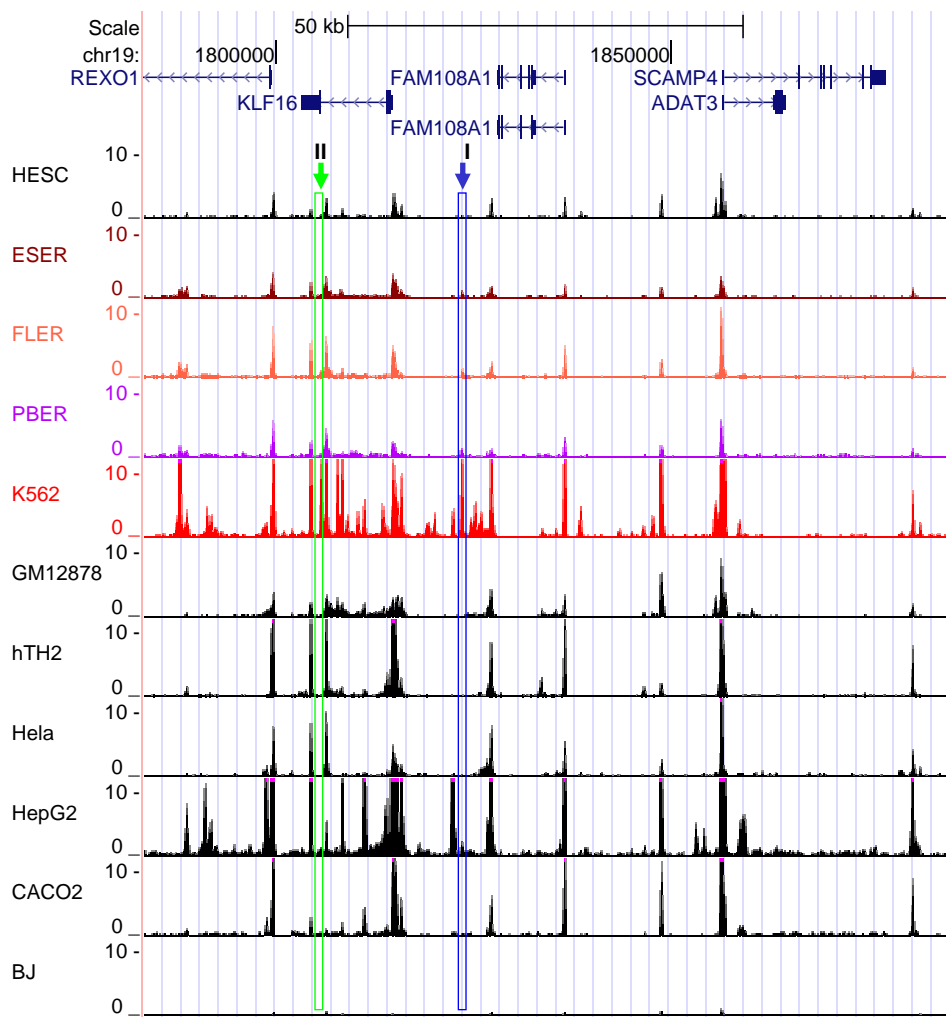

## H

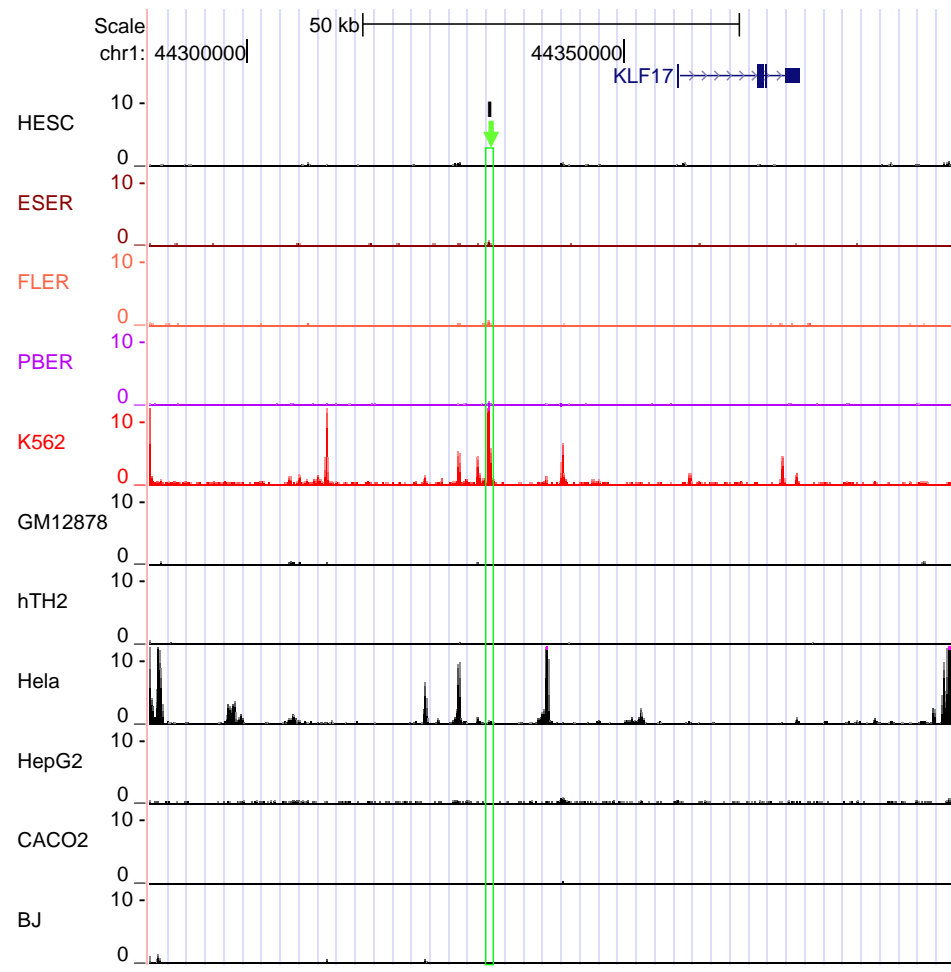

# Supplementary Figure S2

## A

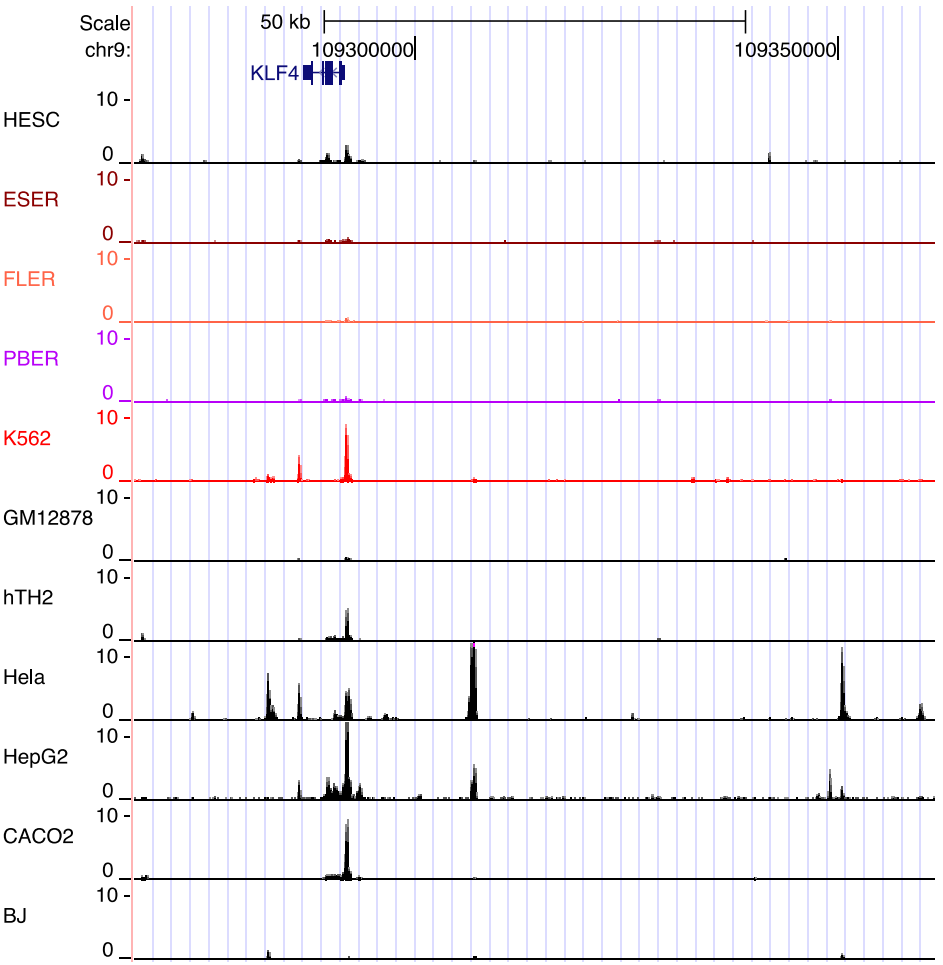

## B

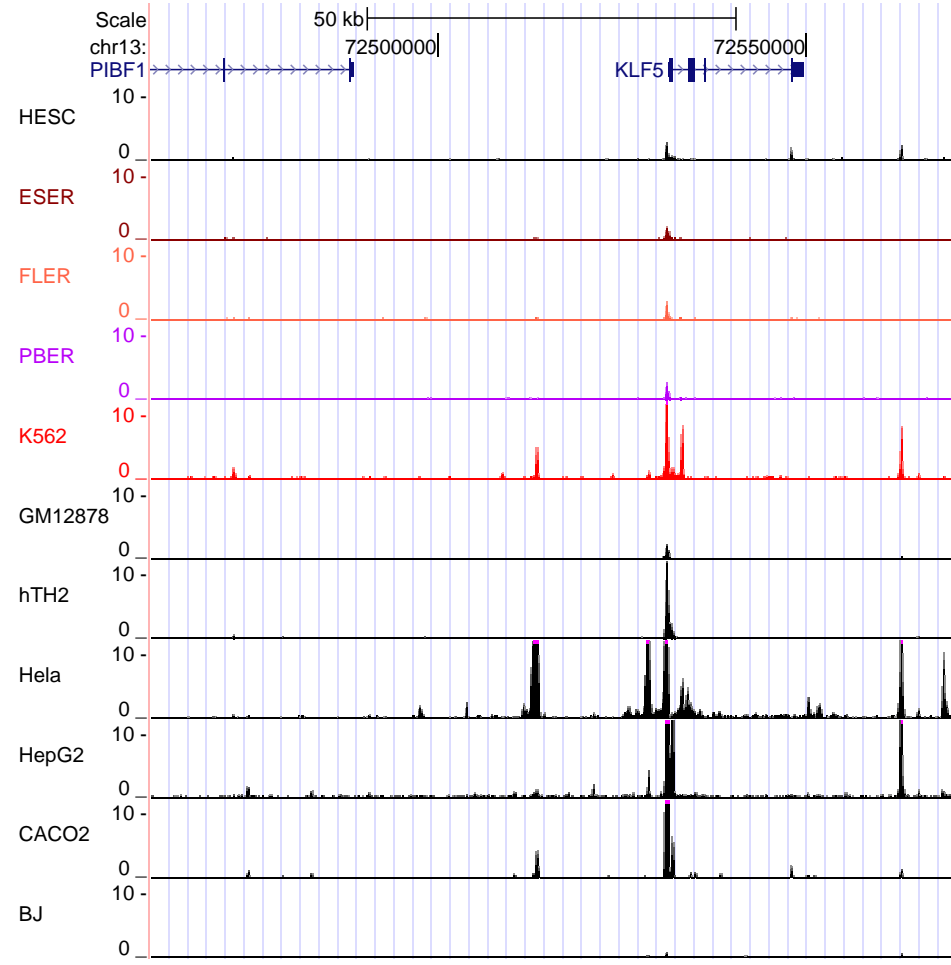

# Supplementary Figure S2

## C

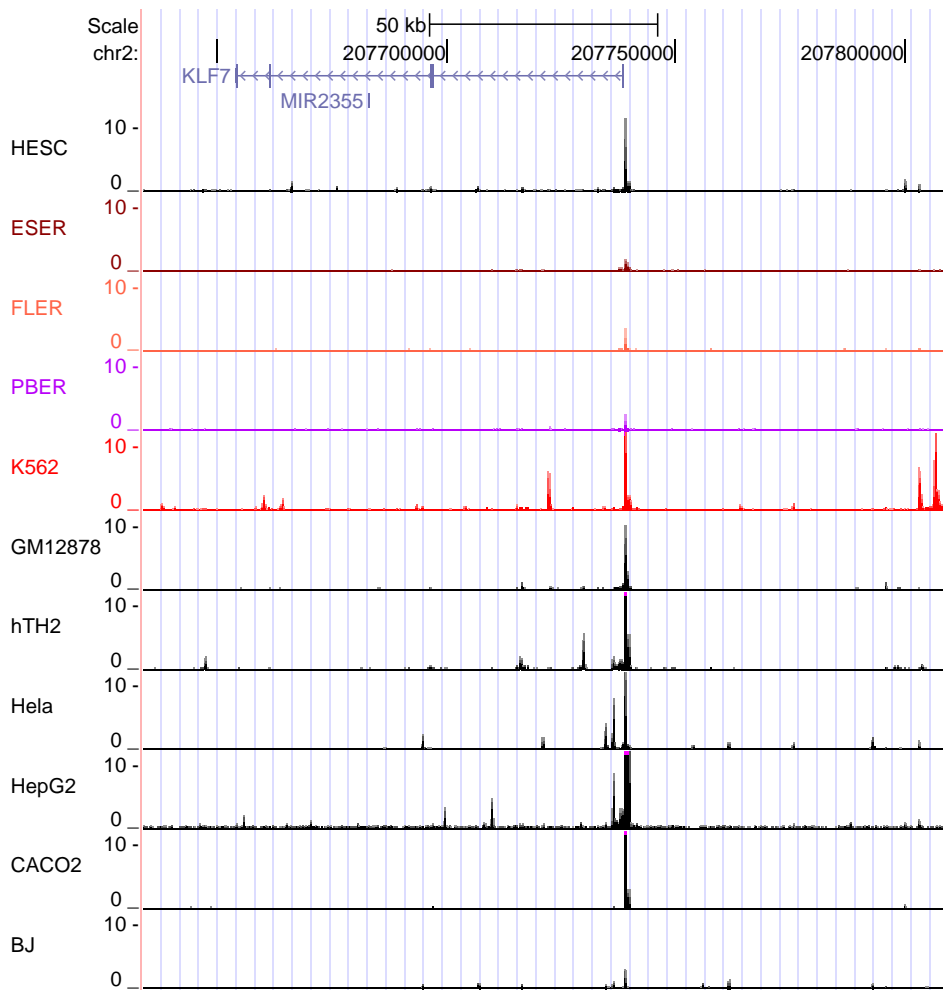

## D

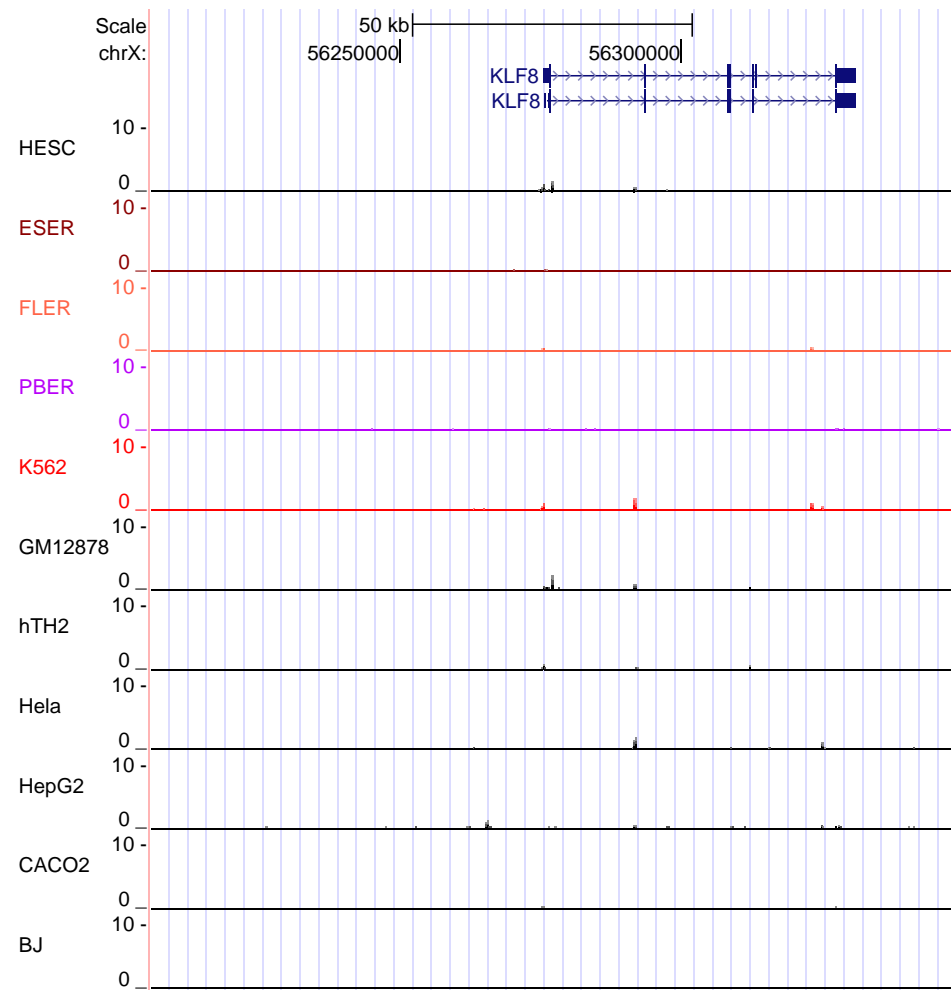

# Supplementary Figure S2

## E

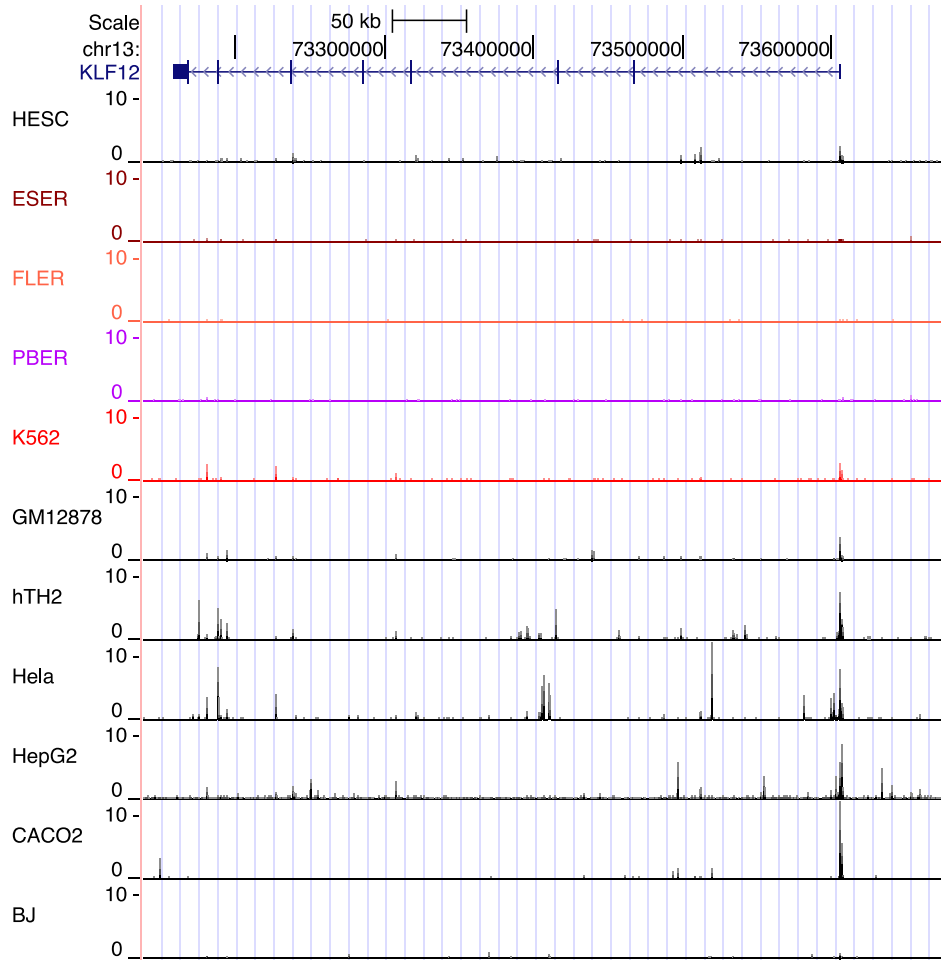

## F

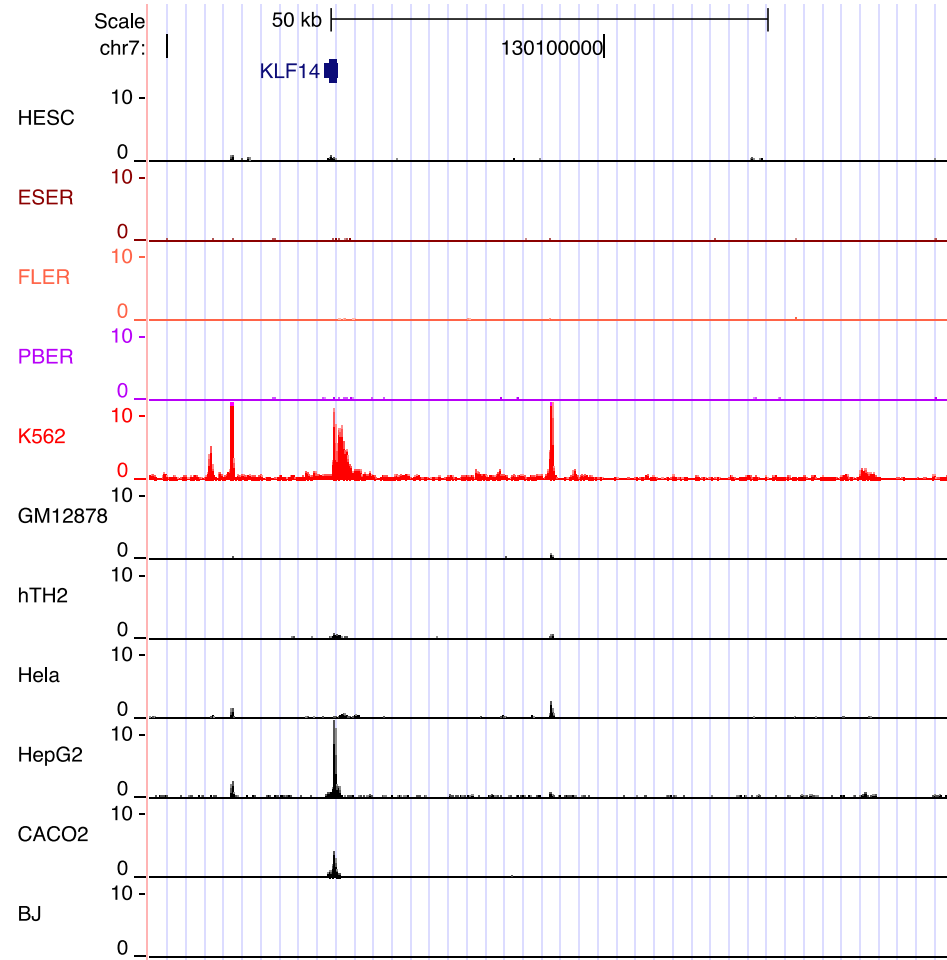

# Supplementary Figure S2

## G

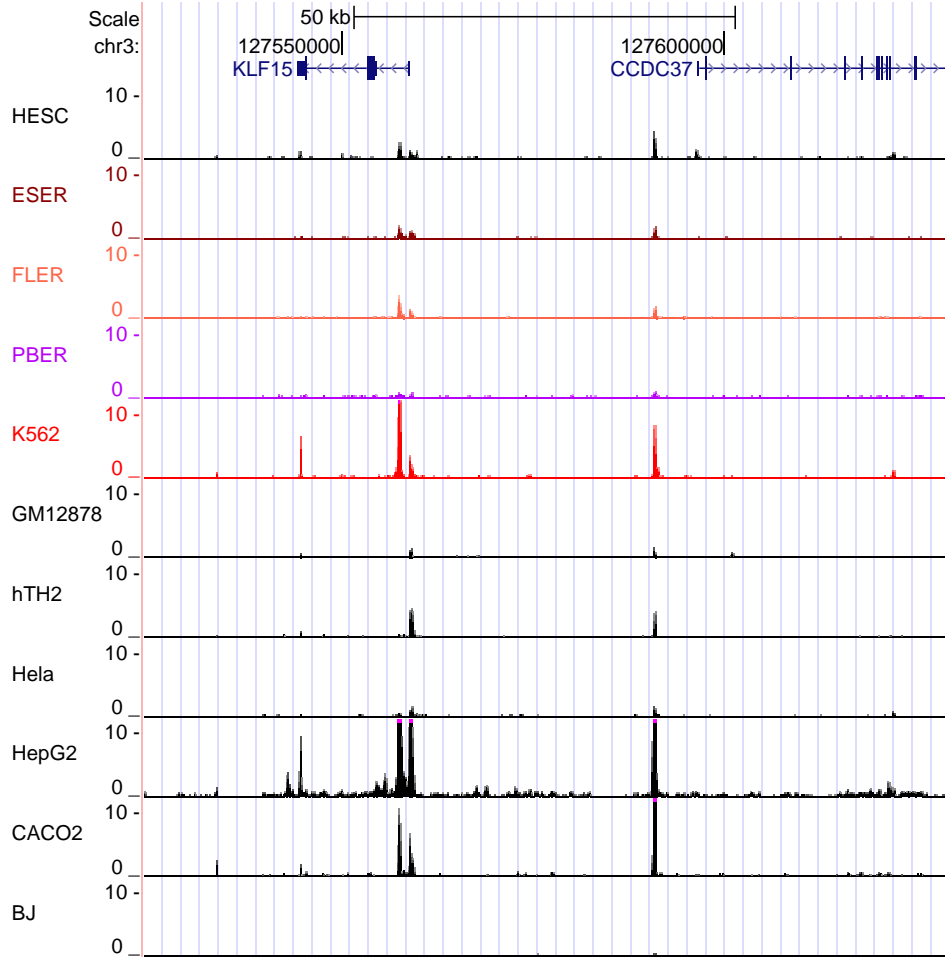



# Supplementary Figure S3

**A** Distribution of erythroid DHSs

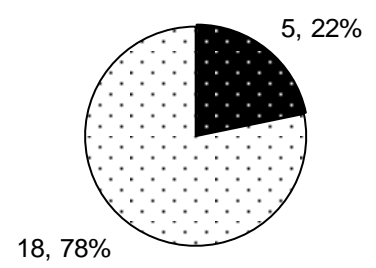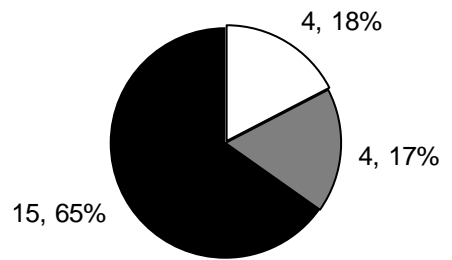

**B** Distribution of enhancers under minP in K562 cells

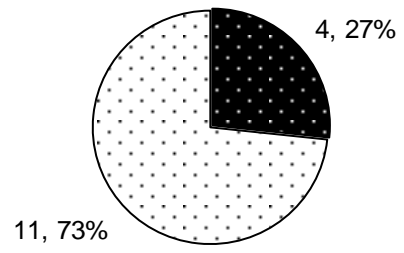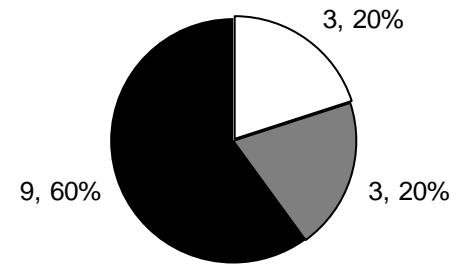

**C** Distribution of erythroid KLF enhancers

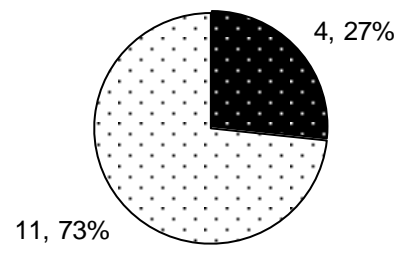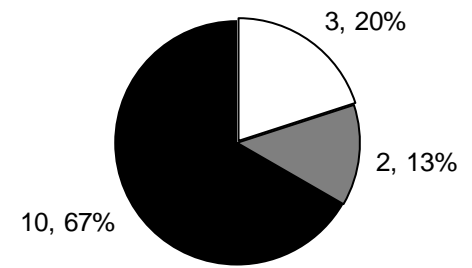

**D** Distribution of erythroid-specific KLF enhancers

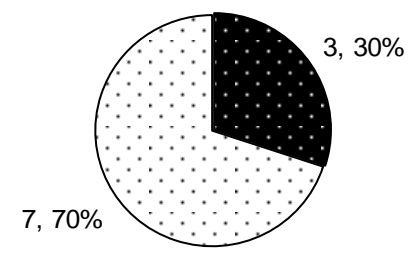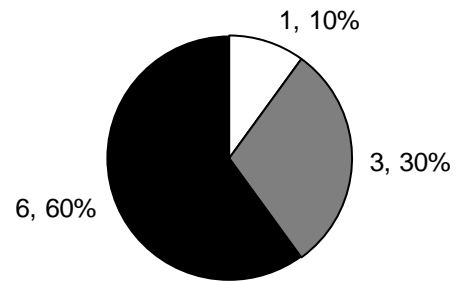

■ Intronic □ Intergenic

□ <2kb ■ 2-10kb ■ >10kb
